# Supplementary material for: LUBAC Suppresses IL-21-Induced Apoptosis in CD40-Activated Murine B Cells and Promotes Germinal Center B Cell Survival and the T-Dependent Antibody Response
Source: PubMed Central journal article supplement (PMC8089397; doi:10.3389/fimmu.2021.658048), 2021-04-19
Supplement: DataSheet_1.pdf [file DataSheet_1.pdf]

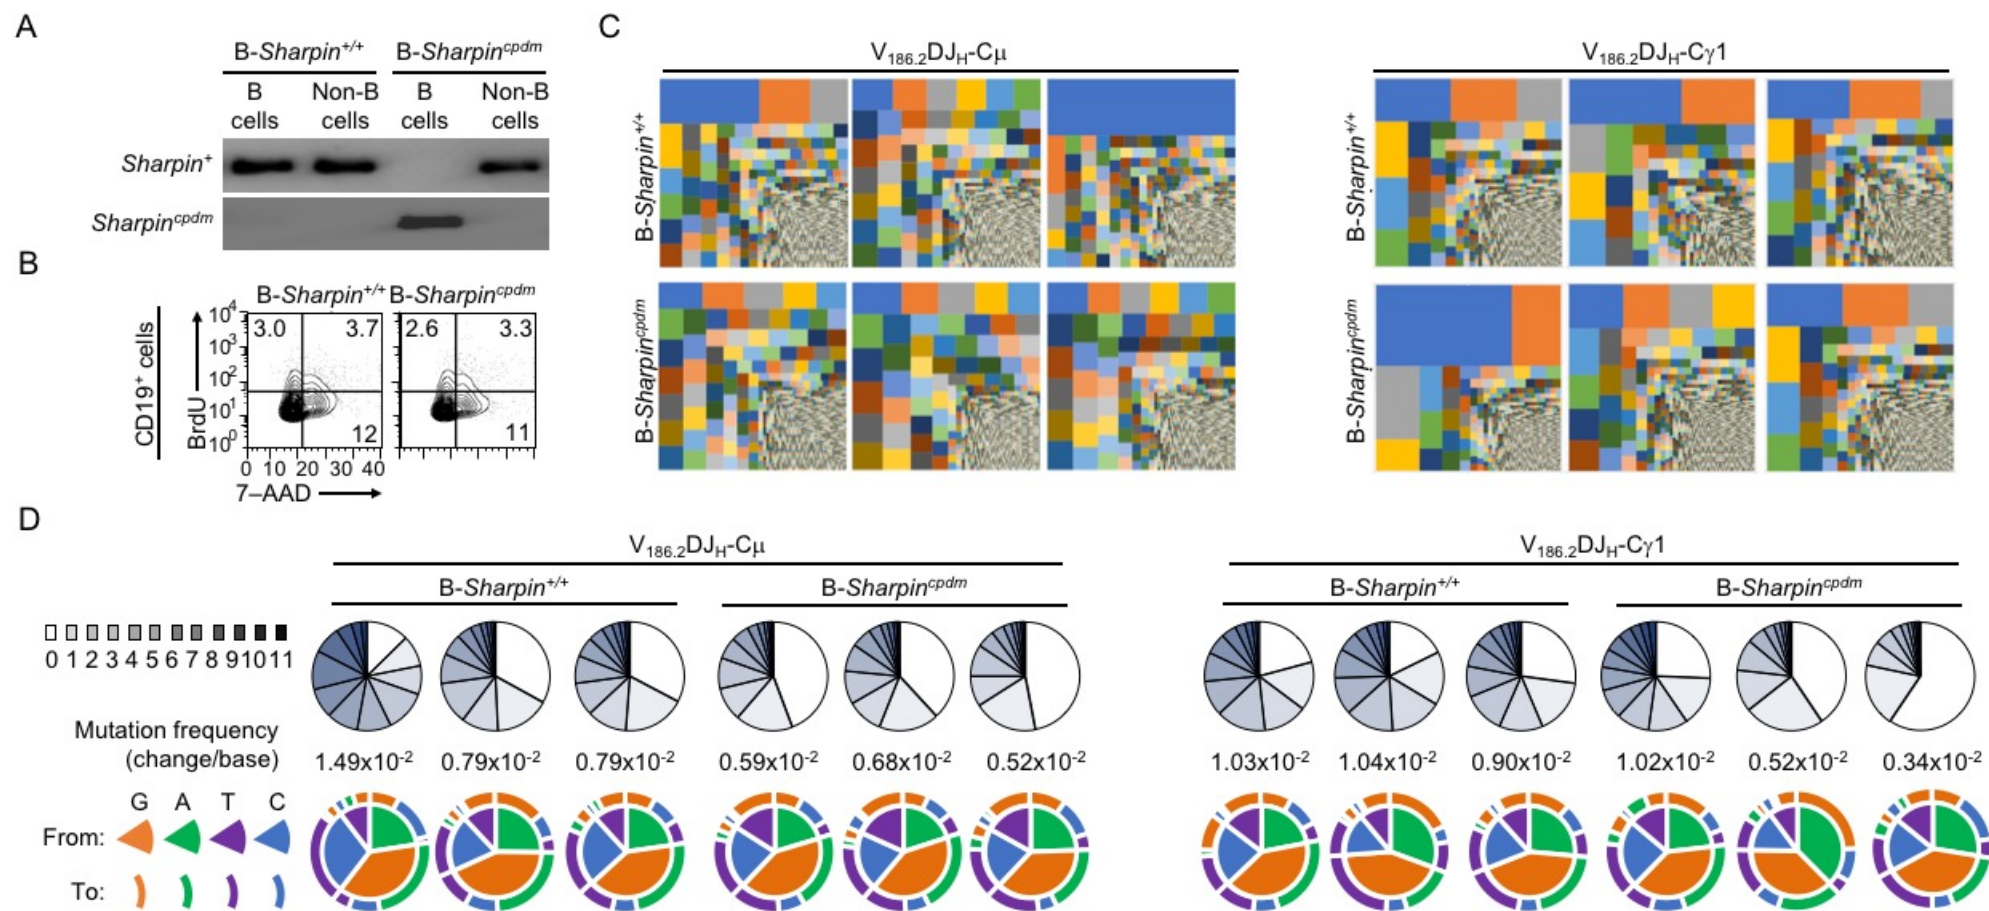

**SUPPLEMENTAL FIGURE 1 | (A)** Genotyping of B cells, as isolated by negative selection, and non-B cells, which were those that bound mAbs and magnetic beads during the negative selection, from the spleen of B-Sharpin<sup>+/+</sup> and B-Sharpin<sup>cpdm</sup> mice. **(B)** Flow cytometry analysis of B cell proliferation (by BrdU incorporation) in the spleen of B-Sharpin<sup>+/+</sup> or B-Sharpin<sup>cpdm</sup> mice 14 d after immunization with NP-CGG/alum. **(C)** Treemap charts depicting B cell clones identified by unique CDR3 sequences in the V<sub>H</sub> region of V<sub>186.2</sub>DJ<sub>H</sub>-C<sub>μ</sub> and V<sub>186.2</sub>DJ<sub>H</sub>-C<sub>γ1</sub> in three B-Sharpin<sup>+/+</sup> mice and three B-Sharpin<sup>cpdm</sup> mice 14 d after NP-CGG/alum immunization. Each rectangle represents a unique clone and the size of each rectangle depicts the relative abundance of the clone within the total population. **(D)** Proportions of V<sub>186.2</sub>DJ<sub>H</sub>-C<sub>μ</sub> and V<sub>186.2</sub>DJ<sub>H</sub>-C<sub>γ1</sub> clones carrying given numbers of point-mutations in V<sub>186.2</sub> region in three B-Sharpin<sup>+/+</sup> mice and three B-Sharpin<sup>cpdm</sup> mice 14 d after NP-CGG/alum immunization, as depicted by pie chart slices (top row; sequences with over 12 point-mutations were excluded from analysis), the overall mutation frequencies (middle), and the nature of such point-mutations, as depicted by concentric pie chart slices and rings (bottom row).

A

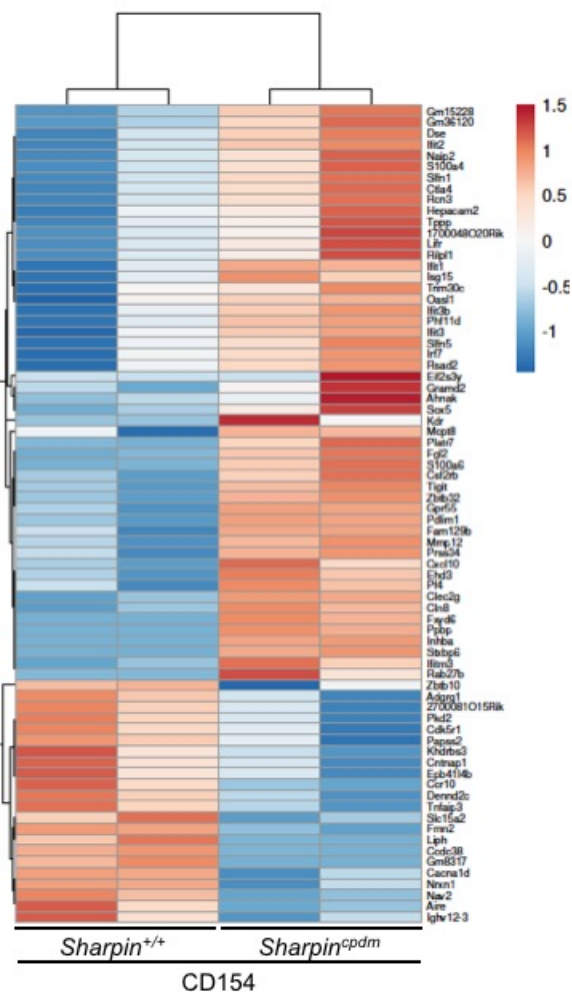

B

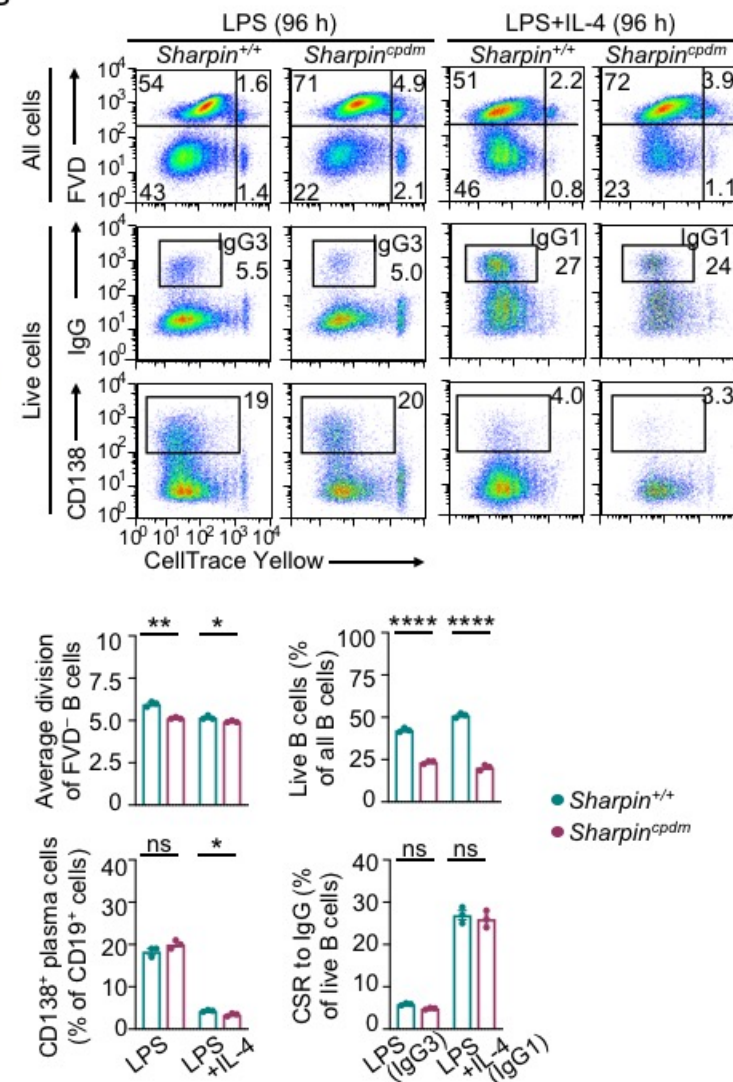

C

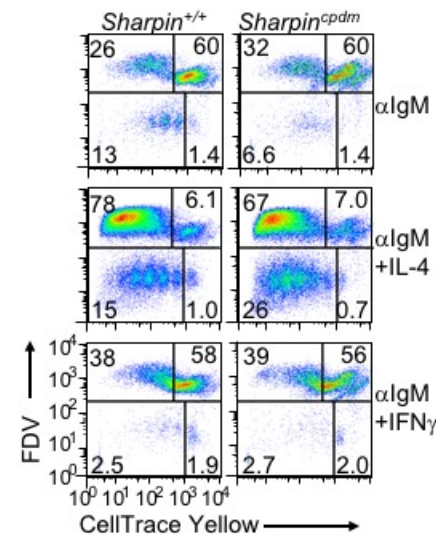

D

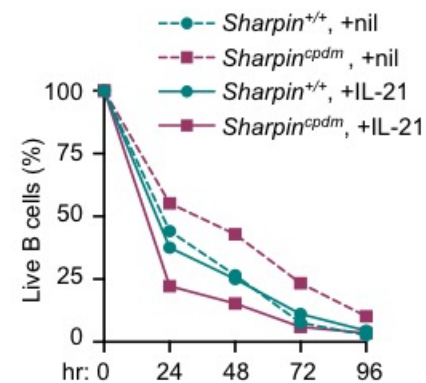

**SUPPLEMENTAL FIGURE 2 | (A)** Heatmap of differentially expressed genes (DEGs) between *Sharpin*<sup>+/+</sup> and *Sharpin*<sup>cpdm</sup> B cells stimulated with CD154 or CD154 plus IL-4 for 24 h. Data are from two independent B cell stimulation and RNA-Seq experiments. **(B)** Flow cytometry analysis of proliferation, cell survival, CSR to IgG1 or IgG3 and plasma cell differentiation in *Sharpin*<sup>+/+</sup> and *Sharpin*<sup>cpdm</sup> B cells after stimulated with LPS or LPS plus IL-4 for 96 h. **(C)** Flow cytometry analysis of proliferation and survival of *Sharpin*<sup>+/+</sup> and *Sharpin*<sup>cpdm</sup> B cells stimulated, as indicated, for 96 h. **(D)** Flow cytometry analysis of proliferation and survival of *Sharpin*<sup>+/+</sup> and *Sharpin*<sup>cpdm</sup> B cells stimulated with nil or IL-21 for different periods of time, as indicated. **(C, D)** Representative of three independent experiments. \*  $p < 0.05$ ; \*\*  $p < 0.01$ ; \*\*\*\*  $p < 0.0001$ ; t-test.

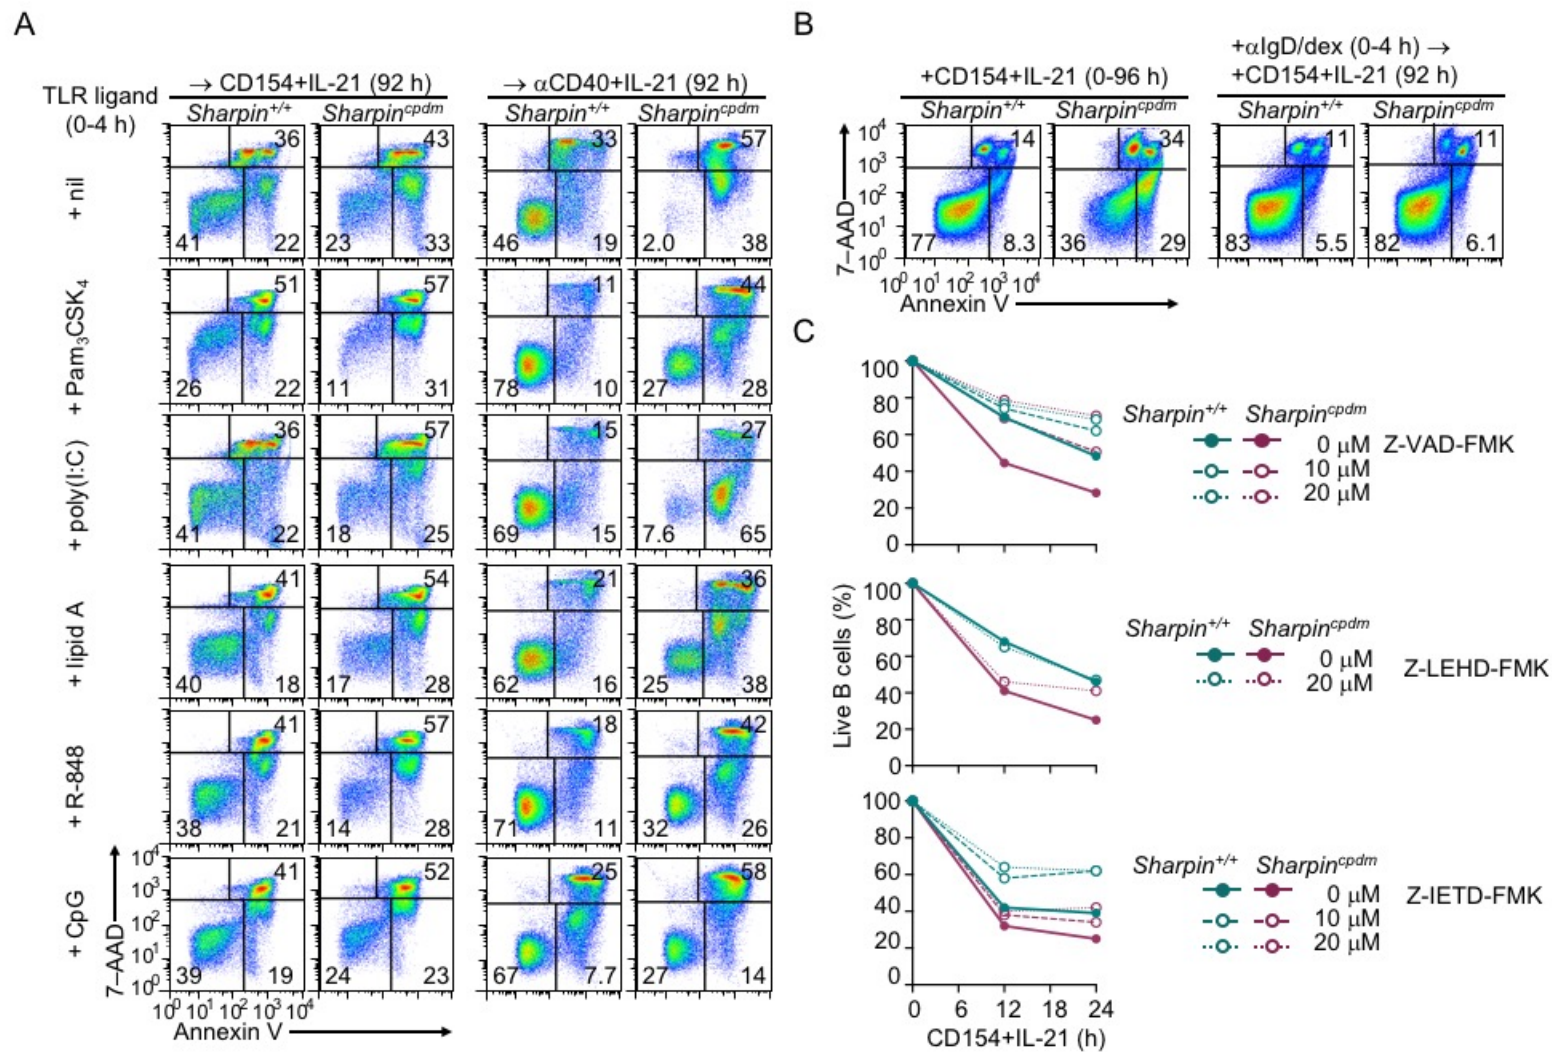

**SUPPLEMENTAL FIGURE 3** | Flow cytometry analysis of apoptosis and necrosis in *Sharpin*<sup>+/+</sup> and *Sharpin*<sup>cpdm</sup> B cells primed with TLR ligands (as indicated, **A**) or  $\alpha$ IgD/dex (**B**) for 4 h and then stimulated with CD154 or  $\alpha$ CD40 plus IL-21 for 92 h. (**C**) Flow cytometry analysis of viability of *Sharpin*<sup>+/+</sup> and *Sharpin*<sup>cpdm</sup> B cells stimulated with CD154 plus IL-21 in the presence of pan-caspase inhibitor Z-VAD-FMK, caspase 9- specific inhibitor Z-LEHD-FMK or caspase 8-specific inhibitor Z-IETD-FMK at different doses, as indicated, for 12 h or 24 h.

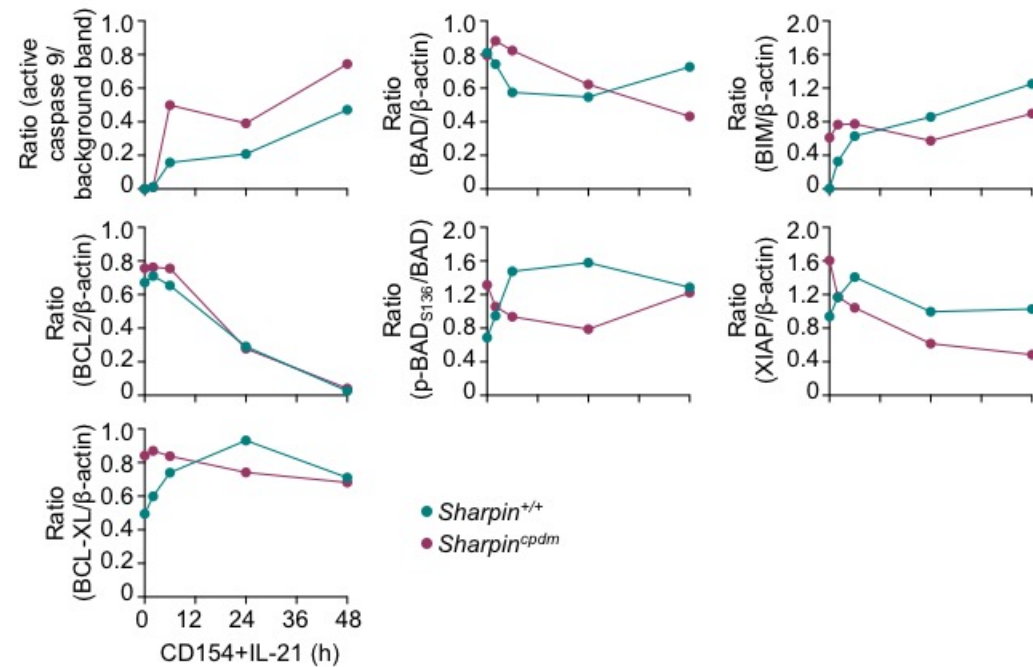

**SUPPLEMENTAL FIGURE 4** | Immunoblotting analysis and quantified signals of caspase 9 activation, BCL2 and BCL-XL expression, BAD expression and phosphorylation as well as expression of BIM and XIAP in *Sharpin*<sup>+/+</sup> and *Sharpin*<sup>cpdm</sup> B cells stimulated with CD154 and IL-21 for different periods of time, as indicated. Data are from Figure 7E.

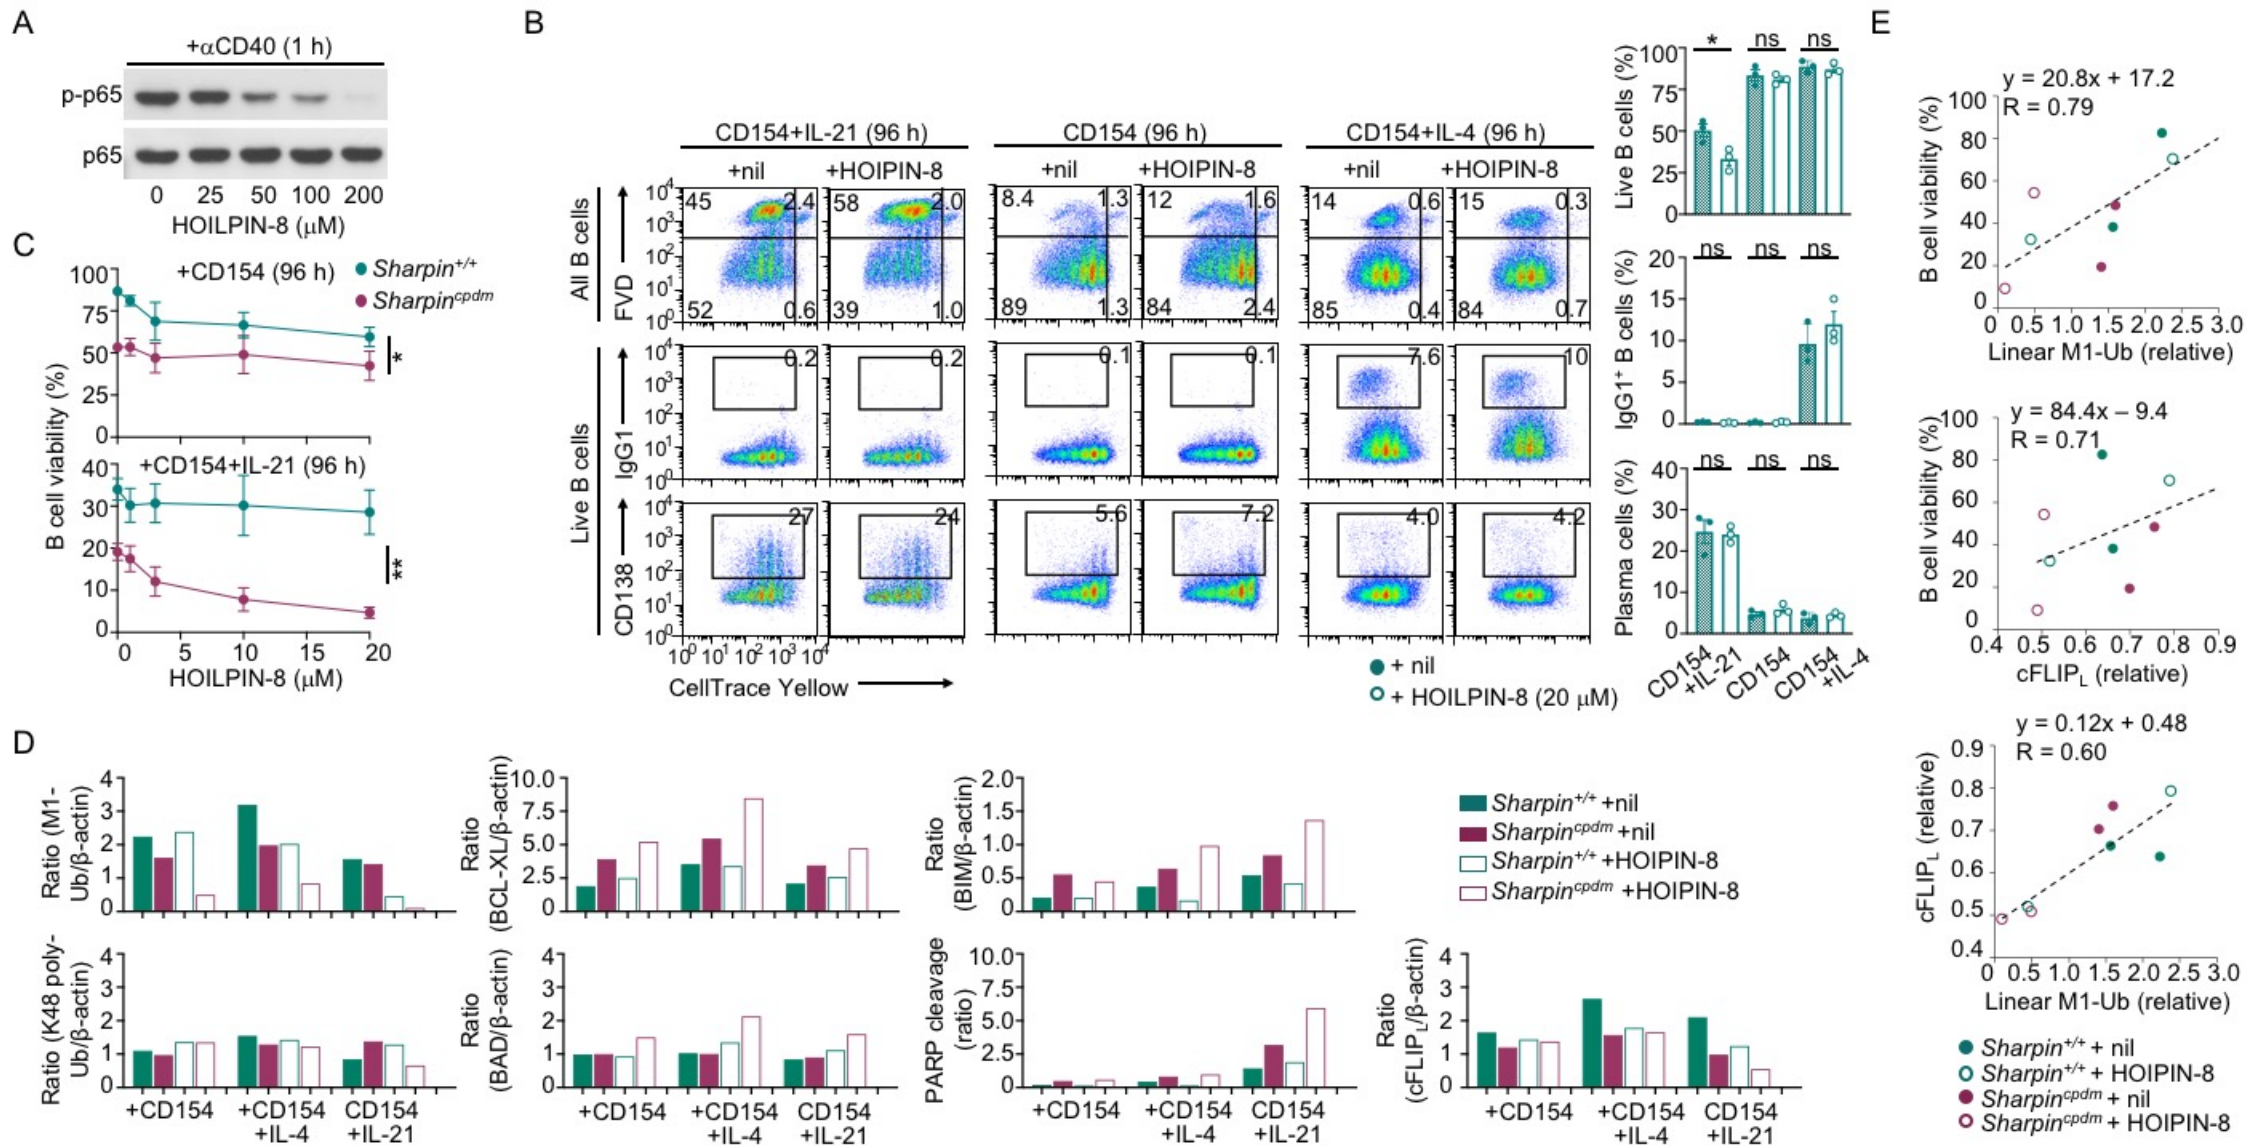

**SUPPLEMENTAL FIGURE 5 | (A)** Immunoblotting of phosphorylated p65 and total p65 protein levels in C57 B cells after stimulation by  $\alpha$ CD40 for 1 h in the presence of different concentrations of HOIPIN-8, as indicated. Representative of two independent experiments. **(B)** Flow cytometry analysis of proliferation, survival, CSR to IgG1 and plasma cell differentiation of C57 B cells stimulated, as indicated, for 96 h in the absence or presence of HOIPIN-8 (\*, <0.05; t-test). **(C)** Flow cytometry analysis of the viability of *Sharpin*<sup>+/+</sup> and *Sharpin*<sup>cpdm</sup> B cells stimulated with CD154 or CD154 plus IL-21 for 96 h in the presence of different concentrations of HOIPIN-8 (triplicates; \*, <0.05; \*\*, <0.01; t-test). **(D)** Quantified signals of linear M1-Ub, K48 poly-Ub, expression of apoptosis factors and PARP cleavage, as determined by immunoblotting analysis, in *Sharpin*<sup>+/+</sup> and *Sharpin*<sup>cpdm</sup> B cells stimulated with CD154 and IL-21 for 48 h in the absence or presence of HOIPIN-8. Data are from Figure 8E. **(E)** Correlation analysis of *Sharpin*<sup>+/+</sup> and *Sharpin*<sup>cpdm</sup> B cell viability (after 96 h of stimulation by CD154 plus IL-21 in the absence or presence of HOIPIN-8; data are from Figure 8B) with the level of linear M1-Ub and the cFLIP<sub>L</sub> protein level as well as that of the cFLIP<sub>L</sub> protein level with linear M1-Ub and K48 poly-Ub (all after 48 h of stimulation by CD154 or CD154 plus IL-21; data are from Figure 8D and Supplemental Fig. 5).
