# Supplementary material for: LUBAC Suppresses IL-21-Induced Apoptosis in CD40-Activated Murine B Cells and Promotes Germinal Center B Cell Survival and the T-Dependent Antibody Response
Source: PubMed Central journal article supplement (PMC8089397; doi:10.3389/fimmu.2021.658048), 2021-04-19
Supplement: DataSheet_2.pdf [file DataSheet_2.pdf]

Supplemental Table 1. Antibodies and reagents.

| Flow Cytometry                             |                        |                                    |
|--------------------------------------------|------------------------|------------------------------------|
| $\alpha$ muCD19-BV421 <sup>TM</sup>        | BD Biosciences         | Cat. # 562701 (Clone 1D3)          |
| $\alpha$ muCD19-APC                        | TONBO Biosciences      | Cat. # 20-0193 (Clone 1D3)         |
| $\alpha$ muB220-FITC                       | BioLegend              | Cat. # 103206 (Clone RA3-6B2)      |
| $\alpha$ muCD3-Pacific Blue <sup>TM</sup>  | BioLegend              | Cat. # 100214 (Clone 17A2)         |
| $\alpha$ muCD3-APC-Cy7                     | BioLegend              | Cat. # 100221 (Clone 17A2)         |
| $\alpha$ muCD4-APC                         | BioLegend              | Cat. # 100412 (Clone GK1.5)        |
| $\alpha$ muCD4-PerCP-Cy5.5                 | eBioscience            | Cat. # 45-0042-82 (Clone RM4-5)    |
| $\alpha$ muCD8b-PE                         | eBioscience            | Cat. # 12-0083-81 (Clone H35-17.2) |
| $\alpha$ muCD11b-APC                       | BioLegend              | Cat. # 101212 (Clone M1/70)        |
| $\alpha$ muCD11c-eFuer450                  | eBioscience            | Cat. # 48-0114-82 (Clone N418)     |
| $\alpha$ muCD11c-APC-Cy7                   | BioLegend              | Cat. # 117323 (Clone N418)         |
| $\alpha$ muIgM-PE                          | BioLegend              | Cat. # 406508 (Clone RMM-1)        |
| $\alpha$ muIgD-APC                         | BioLegend              | Cat. # 405714 (Clone 11-26c.2a)    |
| $\alpha$ muIgG1-APC                        | BioLegend              | Cat. # 406609 (Clone RMG1-1)       |
| $\alpha$ muIgG3-BV421 <sup>TM</sup>        | BD Biosciences         | Cat. # 565808 (Clone R40-82)       |
| $\alpha$ muc-Kit-PE-Cy7                    | BioLegend              | Cat. # 105813 (Clone 2B8)          |
| $\alpha$ muCXCR5-APC                       | BioLegend              | Cat. # 145506 (Clone L138D7)       |
| $\alpha$ muCD23-PE                         | BioLegend              | Cat. # 101607 (Clone B3B4)         |
| $\alpha$ muCD45-BV650 <sup>TM</sup>        | BioLegend              | Cat. # 103151 (Clone 30-F11)       |
| $\alpha$ muCD45-PerCP                      | BioLegend              | Cat. # 103130 (Clone 30-F11)       |
| $\alpha$ muCD45.1-BV510 <sup>TM</sup>      | BioLegend              | Cat. # 110471 (Clone A20)          |
| $\alpha$ muCD45.2-PE-Cy7                   | BioLegend              | Cat. # 109830 (Clone 104)          |
| $\alpha$ muAA4.1-APC                       | BioLegend              | Cat. # 136509 (Clone AA4.1)        |
| $\alpha$ muFAS-BV510 <sup>TM</sup>         | BD Biosciences         | Cat. # 563646 (Clone Jo2)          |
| $\alpha$ muGL-7-PE                         | BioLegend              | Cat. # 144607 (Clone GL7)          |
| $\alpha$ muGL-7-PerCP-Cy5.5                | BioLegend              | Cat. # 144609 (Clone GL7)          |
| $\alpha$ muGr-1-Pacific Blue <sup>TM</sup> | BioLegend              | Cat. # 108430 (Clone RB6-8C5)      |
| $\alpha$ muSca-1-PerCP                     | BioLegend              | Cat. # 108121 (Clone D7)           |
| $\alpha$ muLineage-BV421 <sup>TM</sup>     | BioLegend              | Cat. # 133311                      |
| $\alpha$ muPD-1-FITC                       | eBioscience            | Cat. # 11-9985-85 (Clone J43)      |
| $\alpha$ Cleaved caspase 3-PE              | BD Biosciences         | Cat. # 561011 (Clone C92-605)      |
| $\alpha$ BrdU-APC                          | Biosearch Technologies | Cat. # 339808 (Clone Bu20a)        |
| Immunofluorescence staining                |                        |                                    |
| $\alpha$ muB220-FITC                       | BioLegend              | Cat. # 103206 (Clone RA3-6B2)      |
| $\alpha$ muGL7-PerCP-Cy5.5                 | BioLegend              | Cat. # 144609 (Clone GL7)          |
| ELISA/ELISPOT                              |                        |                                    |
| $\alpha$ muIgM-UNLB                        | SouthernBiotech        | Cat. # 1020-01                     |
| $\alpha$ muIgG-UNLB                        | SouthernBiotech        | Cat. # 1030-01                     |

|                                              |                           |                             |
|----------------------------------------------|---------------------------|-----------------------------|
| $\alpha$ muIgA-UNLB                          | SouthernBiotech           | Cat. # 1040-01              |
| $\alpha$ muIgM-biotin                        | SouthernBiotech           | Cat. # 1020-08              |
| $\alpha$ muIgG1-biotin                       | SouthernBiotech           | Cat. # 1070-08              |
| $\alpha$ muIgG2a-biotin                      | SouthernBiotech           | Cat. # 1080-08              |
| $\alpha$ muIgG2b-biotin                      | SouthernBiotech           | Cat. # 1090-08              |
| $\alpha$ muIgG3-biotin                       | SouthernBiotech           | Cat. # 1100-08              |
| $\alpha$ muIgA-biotin                        | SouthernBiotech           | Cat. # 1040-08              |
| NP <sub>7</sub> -BSA                         | Biosearch Technologies    | Cat. # N-5050L-10           |
| NP <sub>34</sub> -BSA                        | Biosearch Technologies    | Cat. # N-5050H-10           |
| Other flow cytometry reagents                |                           |                             |
| Fixable Viability Dye eFlour™ 780            | eBioscience               | Cat. # 65-0865-14           |
| Ghost Dye™ Red 710                           | TONBO Biosciences         | Cat. # 13-0871-T500         |
| 7-Aminoactinomycin D (7-AAD)                 | Sigma Aldrich             | Cat. # A9400                |
| Immunoblotting                               |                           |                             |
| $\alpha$ M1 linear ubiquitin                 | Millipore-Sigma           | Cat. # MABS451 (Clone LUB9) |
| $\alpha$ K48-linkage Polyubiquitin           | Cell Signaling Technology | Cat. # 12805                |
| $\alpha$ Ubiquitin                           | Cell Signaling Technology | Cat. # 3933                 |
| $\alpha$ Caspase-3 (D3R6Y)                   | Cell Signaling Technology | Cat. # 14220                |
| $\alpha$ Cleaved Caspase-3 (Asp175)          | Cell Signaling Technology | Cat. # 9661T                |
| $\alpha$ Cleaved Caspase-9 (Asp353)          | Cell Signaling Technology | Cat. # 9509T                |
| $\alpha$ BIM (C34C5)                         | Cell Signaling Technology | Cat. # 2933T                |
| $\alpha$ BCL-2 (D17C4)                       | Cell Signaling Technology | Cat. # 3498T                |
| $\alpha$ Caspase-8 (1C12)                    | Cell Signaling Technology | Cat. # 9746                 |
| $\alpha$ Caspase-9 (C9)                      | Cell Signaling Technology | Cat. # 9508                 |
| $\alpha$ PARP                                | Cell Signaling Technology | Cat. # 9542                 |
| $\alpha$ cFLIP (D5J1E)                       | Cell Signaling Technology | Cat. # 56343                |
| $\alpha$ BCL-XL (54H6)                       | Cell Signaling Technology | Cat. # 2764T                |
| $\alpha$ BAX (D3R2M)                         | Cell Signaling Technology | Cat. # 14796S               |
| $\alpha$ BAD (D24A9)                         | Cell Signaling Technology | Cat. # 9239                 |
| $\alpha$ Phospho-BAD (Ser136)                | Cell Signaling Technology | Cat. # 4366                 |
| $\alpha$ Cytochrome C (D18C7)                | Cell Signaling Technology | Cat. # 11940                |
| $\alpha$ Phospho-NF- $\kappa$ B p65 (Ser536) | Cell Signaling Technology | Cat. # 3033                 |
| $\alpha$ NF- $\kappa$ B p65 (D14E12)         | Cell Signaling Technology | Cat. # 8242                 |
| $\alpha$ XIAP                                | Cell Signaling Technology | Cat. # 2042                 |
| $\alpha$ Phospho-STAT3 (Tyr705)              | Cell Signaling Technology | Cat. # 9145                 |
| $\alpha$ Phospho-STAT5 (Tyr694)              | Cell Signaling Technology | Cat. # 4322                 |
| $\alpha$ STAT3 (79D7)                        | Cell Signaling Technology | Cat. # 4904                 |
| $\alpha$ STAT5 (D2O6Y)                       | Cell Signaling Technology | Cat. # 94205                |
| $\alpha$ - $\beta$ -actin (13E5)             | Cell Signaling Technology | Cat. # 4970S                |

Supplemental Table 2. Oligonucleotide sequences.

| qRT-PCR                                                                |                                |                                                                    |
|------------------------------------------------------------------------|--------------------------------|--------------------------------------------------------------------|
| Gene                                                                   | Forward primer                 | Reverse primer                                                     |
| <i>Aicda</i>                                                           | 5'-AGAAAGTCACGCTGGAGACC-3'     | 5'-CTCCTCTTCACCACGTAGCA-3'                                         |
| <i>Prdm1</i>                                                           | 5'-TTCTCTTGAAAAACGTGTGGG-3'    | 5'-GGAGCCGGAGCTAGACTTG-3'                                          |
| <i>Iγ1-Cγ1</i>                                                         | 5'-TCGAGAAGCCTGAGGAATGTG-3'    | 5'-ATGGAGTTAGTTTGGGCAGCA-3'                                        |
| <i>Iγ2a-Cγ2a</i>                                                       | 5'-GCTGATGTACCTACCGAGAGA-3'    | 5'-GCTGGGCCAGGTGTTTCGAGGTT-3'                                      |
| <i>Cflar</i>                                                           | 5'-GCTCCAGAATGGGCGAAGTAA-3'    | 5'-ACGGATGTGCGGAGGTAAAAA-3'                                        |
| <i>Bcl2</i>                                                            | 5'-ATGCCTTTGTGGAACATATATGGC-3' | 5'-GGTATGCACCCAGAGTGATGC-3'                                        |
| <i>Bcl2l1</i>                                                          | 5'-GACAAGGAGATGCAGGTATTGG-3'   | 5'-TCCCGTAGAGATCCACAAAAGT-3'                                       |
| <i>Mcl1</i>                                                            | 5'-AAAGGCGGCTGCATAAGTC-3'      | 5'-TGGCGGTATAGGTCGTCCTC-3'                                         |
| <i>Bcl2l1l</i>                                                         | 5'-CCCGGAGATACGGATTGCAC-3'     | 5'-GCCTCGCGGTAATCATTTGC-3'                                         |
| <i>Bad</i>                                                             | 5'-AAGTCCGATCCCGGAATCC-3'      | 5'-GCTCACTCGGCTCAAACCTCT-3'                                        |
| <i>Bax</i>                                                             | 5'-CCGGCGAATTGGAGATGAACT-3'    | 5'-CCAGCCCATGATGGTTCTGAT-3'                                        |
| <i>Cd79b</i>                                                           | 5'-TGTTGGAATCTGCAAATGGA-3'     | 5'-TAGGCTTTGGGTGATCCTTG-3'                                         |
| <i>Gapdh</i>                                                           | 5'-AGGTCGGTGTGAACGGATTTG-3'    | 5'-TGTAGACCATGTAGTTGAGGTCA-3'                                      |
| Genotyping                                                             |                                |                                                                    |
| <i>Sharpin</i> <sup>+</sup>                                            | 5'-TTAGGCACCGAGCCTGGGG-3'      | 5'-TCGACCAGGTGGCCCGGACATATT-3'                                     |
| <i>Sharpin</i> <sup>epdm</sup>                                         | 5'-TTAGGCACCGAGCCTGGGG-3'      | 5'-TCGACCAGGTGGCCCGGACATATT-3'                                     |
| <i>Igh</i> <sup>+</sup>                                                | 5'-CCGTCTAGCTTGAGCTATTAGG-3'   | 5'-GAAGAGGACGATGAAGGTGG-3'                                         |
| <i>Igh</i> <sup>μMT</sup>                                              | 5'-CCGTCTAGCTTGAGCTATTAGG-3'   | 5'-TTGTGCCAGTCATAGCCGAAT-3'                                        |
| V <sub>186.2</sub> amplicon                                            |                                |                                                                    |
| V <sub>186.2</sub> DJ <sub>H</sub> -C <sub>μ</sub>                     | 5'-CATGCTCTTCTTGGCAGCAACAGC-3' | 5'-CCTGTCCTCAGTGTTGGGAA-3'                                         |
| V <sub>186.2</sub> DJ <sub>H</sub> -C <sub>γ1</sub>                    | 5'-CATGCTCTTCTTGGCAGCAACAGC-3' | 5'-GTGCACACCGCTGGACAGGGATCC-3'                                     |
| V <sub>186.2</sub> DJ <sub>H</sub> -C <sub>μ</sub><br>with adaptor R2  | 5'-CATGCTCTTCTTGGCAGCAACAGC-3' | 5'-[GTCTCGTGGGCTCGGAGATGTGTATAAG<br>AGACAG]GAAATGGTGCTGGGCAGGAA-3' |
| V <sub>186.2</sub> DJ <sub>H</sub> -C <sub>γ1</sub><br>with adaptor R2 | 5'-CATGCTCTTCTTGGCAGCAACAGC-3' | 5'-[GTCTCGTGGGCTC]AGTTTGGGCAGCA-<br>3'                             |
